# Supplementary material
Source: PubMed Central journal article supplement (PMC5540044)
Supplement: jamaoncol-3-810-s001.pdf [file jamaoncol-3-810-s001.pdf]

## Supplementary Online Content

Han JJ, Beltran T, Song JW, Klaric J, Choi YS. Prevalence of genital human papillomavirus infection and human papillomavirus vaccination rates among US adult men: National Health and Nutrition Examination Survey (NHANES) 2013-2014. *JAMA Oncol*. Published online January 19, 2017. doi:10.1001/jamaoncol.2016.6192

**eTable 1.** Prevalence of HPV Infection by Demographic Characteristics

**eTable 2.** HPV Infection in US Adult Men: Prevalence in the Population and in Defined Risk Groups

This supplementary material has been provided by the authors to give readers additional information about their work.

**eTable 1.** Prevalence of HPV Infection by Demographic Characteristics<sup>a</sup>

| Characteristic                      | Subgroup Total    | All HPV infections |                                    |                | HR DNA test <sup>c</sup> |                                    |                |
|-------------------------------------|-------------------|--------------------|------------------------------------|----------------|--------------------------|------------------------------------|----------------|
|                                     |                   | <i>n</i>           | Prevalence: Weighted % (95% CP CI) | <i>P</i> Value | <i>n</i>                 | Prevalence: Weighted % (95% CP CI) | <i>P</i> Value |
| Men aged 18-59                      | 1757 <sup>d</sup> | 795                | 45.2 (41.3 – 49.3)                 |                | 447                      | 25.1 (23.0 – 27.3)                 |                |
| <b>Age in years</b>                 |                   |                    |                                    |                |                          |                                    |                |
| 18 - 22                             | 262               | 75                 | 28.9 (22.2 – 36.8)                 | <.001          | 51                       | 17.7 (11.2 – 25.9)                 | .08            |
| 23 - 27                             | 213               | 104                | 46.5 (38.4 - 54.7)                 |                | 68                       | 31.1 (22.5 – 40.7)                 |                |
| 28 - 32                             | 218               | 114                | 50.8 (40.1 – 61.5)                 |                | 64                       | 27.9 (20.0 – 36.9)                 |                |
| 33 - 37                             | 195               | 87                 | 43.1 (35.8 – 50.8)                 |                | 50                       | 24.9 (18.9 – 31.9)                 |                |
| 38 - 42                             | 198               | 82                 | 41.8 (33.7 – 50.4)                 |                | 41                       | 19.2 (14.0 – 25.4)                 |                |
| 43 - 47                             | 204               | 95                 | 47.2 (39.9 – 54.7)                 |                | 48                       | 25.3 (18.7 – 32.8)                 |                |
| 48 - 52                             | 195               | 100                | 50.0 (43.1 – 56.9)                 |                | 51                       | 22.5 (16.8 – 29.0)                 |                |
| 53 - 57                             | 195               | 92                 | 47.2 (38.2 – 56.4)                 |                | 51                       | 26.2 (17.9 – 35.9)                 |                |
| 58 - 59                             | 77                | 46                 | 59.7 (44.5 – 73.3)                 |                | 23                       | 37.5 (21.9 – 55.4)                 |                |
| <b>Race/Ethnicity</b>               |                   |                    |                                    |                |                          |                                    |                |
| Hispanic                            | 402               | 175                | 44.4 (37.7 - 51.3)                 | <.001          | 84                       | 21.9 (18.0 – 26.3)                 | <.001          |
| Non-Hispanic White                  | 714               | 314                | 43.7 (38.1 – 49.6)                 |                | 185                      | 24.7 (21.5 – 28.0)                 |                |
| Non-Hispanic Black                  | 362               | 230                | 65.0 (59.7 – 70.0)                 |                | 143                      | 40.2 (35.1 – 45.5)                 |                |
| Non-Hispanic Asian                  | 209               | 52                 | 24.4 (18.4 – 31.5)                 |                | 25                       | 12.2 (7.2 – 18.8)                  |                |
| Other Race - Including Multi-Racial | 70                | 24                 | 41.0 (24.7 – 59.4)                 |                | 10                       | 17.4 (8.04 – 30.8)                 |                |
| <b>Marital Status<sup>b</sup></b>   |                   |                    |                                    |                |                          |                                    |                |
| Married                             | 821               | 321                | 39.1 (33.6 – 44.8)                 | <.001          | 144                      | 18.2 (15.6 – 21.1)                 | <.001          |
| Widowed, Divorced, Separated        | 184               | 117                | 63.6 (55.3 – 71.3)                 |                | 75                       | 42.0 (34.8 – 49.5)                 |                |
| Never married                       | 447               | 217                | 48.7 (42.4 – 55.1)                 |                | 139                      | 29.7 (23.8 – 36.1)                 |                |
| Living with partner                 | 170               | 113                | 62.5 (53.4 – 70.8)                 |                | 70                       | 39.2 (29.2 – 49.9)                 |                |
| <b>Education<sup>b</sup></b>        |                   |                    |                                    |                |                          |                                    |                |
| <High School                        | 380               | 174                | 46.4 (39.2 – 53.7)                 | <.002          | 100                      | 25.4 (19.9 – 31.6)                 | <.001          |
| High School or GED                  | 439               | 223                | 53.7 (47.1 – 60.2)                 |                | 142                      | 33.9 (29.5 – 38.5)                 |                |
| >High School                        | 936               | 397                | 41.4 (36.4 – 46.6)                 |                | 204                      | 21.4 (18.2 – 24.8)                 |                |
| <b>Household Income<sup>b</sup></b> |                   |                    |                                    |                |                          |                                    |                |
| Below poverty level                 | 388               | 189                | 52.9 (45.3 – 60.4)                 | .05            | 123                      | 34.8 (28.1 – 41.9)                 | .01            |
| At or above poverty level           | 1230              | 555                | 44.2 (39.3 – 49.3)                 |                | 297                      | 23.8 (21.1 – 26.5)                 |                |

| Characteristic                                        | Subgroup Total | All HPV infections |                                    |                | HR DNA testing <sup>c</sup> |                                    |                |
|-------------------------------------------------------|----------------|--------------------|------------------------------------|----------------|-----------------------------|------------------------------------|----------------|
|                                                       |                | <i>n</i>           | Prevalence: Weighted % (95% CP CI) | <i>P</i> Value | <i>n</i>                    | Prevalence: Weighted % (95% CP CI) | <i>P</i> Value |
| <b>Smoking Status<sup>b</sup></b>                     |                |                    |                                    |                |                             |                                    |                |
| Current Smoker                                        | 476            | 278                | 60.6 (52.3 - 68.3)                 | .05            | 154                         | 32.0 (27.1 – 37.3)                 | .35            |
| Non-Smoker                                            | 334            | 162                | 50.9 (45.0 - 56.7)                 |                | 89                          | 28.3 (23.5 – 33.4)                 |                |
| <b>Circumcision<sup>b</sup></b>                       |                |                    |                                    |                |                             |                                    |                |
| Circumcised                                           | 1068           | 520                | 47.5 (43.1 - 51.9)                 | .03            | 311                         | 27.2 (24.1 – 30.5)                 | .01            |
| Uncircumcised                                         | 452            | 196                | 43.2 (39.1 - 47.5)                 |                | 91                          | 20.6 (17.0 – 24.7)                 |                |
| <b>Age when first had sex<sup>b</sup></b>             |                |                    |                                    |                |                             |                                    |                |
| <16 yrs old                                           | 540            | 294                | 52.1 (46.7 - 57.4)                 | <.001          | 169                         | 29.2 (23.8 – 35.1)                 | .02            |
| 16-18 yrs old                                         | 390            | 171                | 43.1 (35.0 - 51.4)                 |                | 88                          | 22.8 (18.1 – 28.0)                 |                |
| >18 yrs old                                           | 373            | 121                | 32.2 (25.7 - 39.4)                 |                | 61                          | 15.9 (10.1 – 23.3)                 |                |
| <b>Lifetime number of sexual partners<sup>b</sup></b> |                |                    |                                    |                |                             |                                    |                |
| 0                                                     | 4              | 0                  | ND                                 | ND             | 0                           | ND                                 | ND             |
| 1                                                     | 1              | 1                  | ND                                 |                | 1                           | ND                                 |                |
| 2-5                                                   | 20             | 7                  | 34.9 (14.0 - 64.0)                 |                | 3                           | 7.4 (0.5 – 28.3)                   |                |
| 6-10                                                  | 16             | 12                 | 77.0 (43.4 - 93.6)                 |                | 5                           | 34.1 (10.5 – 65.5)                 |                |
| >10                                                   | 45             | 32                 | 58.4 (43.4 - 71.9)                 |                | 19                          | 39.6 (25.4 – 55.3)                 |                |

a. Statistical abbreviations: CI: Clopper-Pearson Confidence Interval; ND – Not Defined/Inestimable.

b. Does not sum to 1757 due to non-response or participant indicating “Don’t know”. This sample after application of sampling weights represents over 73 million men in the non-institutionalized US population. Data are unweighted frequencies; estimated prevalence and 95% confidence intervals are weighted.

c. Positive for at least one of the HPV genotypes in the HR HPV DNA test: 16, 18, 31, 33, 35, 39, 45, 51, 52, 56, 58, 59, 66, 68.

d. The unweighted sample (n=1757) represents a weighted sample of 76.9 million US non-institutionalized men.

**eTable 2.** HPV Infection in US Men: Prevalence in the Population and in Defined Risk Groups

| HPV Infection Status   | Men 18-59 |                     | HPV Vaccine Eligible Men (Age 18-32) |                     | HPV Vaccine Non-Eligible Men (Age 33-59) |                     | P Value <sup>a</sup> |
|------------------------|-----------|---------------------|--------------------------------------|---------------------|------------------------------------------|---------------------|----------------------|
|                        | <i>n</i>  | Weighted % (95% CI) | <i>n</i>                             | Weighted % (95% CI) | <i>n</i>                                 | Weighted % (95% CI) |                      |
| Positive               | 795       | 45.2 (41.3 – 49.3)  | 293                                  | 42.2 (36.4 – 48.2)  | 502                                      | 47.1 (42.4 – 51.8)  | .11                  |
| Negative               | 962       | 54.8 (50.7 – 58.7)  | 400                                  | 57.8 (51.8 – 63.6)  | 562                                      | 52.9 (48.2 – 57.6)  |                      |
| Total                  | 1757      |                     | 693                                  |                     | 1064                                     |                     |                      |
| <b>Risk Groups</b>     |           |                     |                                      |                     |                                          |                     |                      |
| High Risk <sup>b</sup> | 518       | 30.5 (28.1 – 33.0)  | 210                                  | 29.5 (25.0 – 34.3)  | 308                                      | 29.1 (26.4 – 33.0)  | .88                  |
| Low Risk               | 277       | 16.0 (13.4 – 18.9)  | 83                                   | 12.7 (9.1 – 17.1)   | 194                                      | 18.0 (14.4 – 22.0)  | .05                  |
| 4vHPV <sup>c</sup>     | 152       | 8.5 (7.1 – 10.0)    | 56                                   | 7.1 (5.1 – 9.5)     | 96                                       | 9.3 (7.3 – 11.6)    | .16                  |
| 9vHPV <sup>d</sup>     | 271       | 15.1 (13.7 – 16.6)  | 107                                  | 15.4 (11.7 – 19.6)  | 155                                      | 14.6 (12.5 – 16.9)  | .83                  |

- a. *p* values from Rao-Scott chi square tests compare HPV-vaccine eligible and non-eligible males as defined in Methods.
- b. The High Risk category includes those co-infected with both High and Low Risk HPV genotypes.
- c. 4vHPV includes infection by one or more of the HPV types covered by the quadrivalent form of Gardasil (types 6,11,16, and 18).
- d. 9vHPV includes infection by one or more of the HPV types covered by the 9-valent form of Gardasil (types 6,11,16, 18, 31, 33, 45, 52, and 58).
